# Supplementary material for: LAG3 blockade coordinates with microwave ablation to promote CD8+ T cell-mediated anti-tumor immunity
Source: Springer Nature journal article supplement (doi:10.1186/s12967-022-03646-7), 2022-09-30

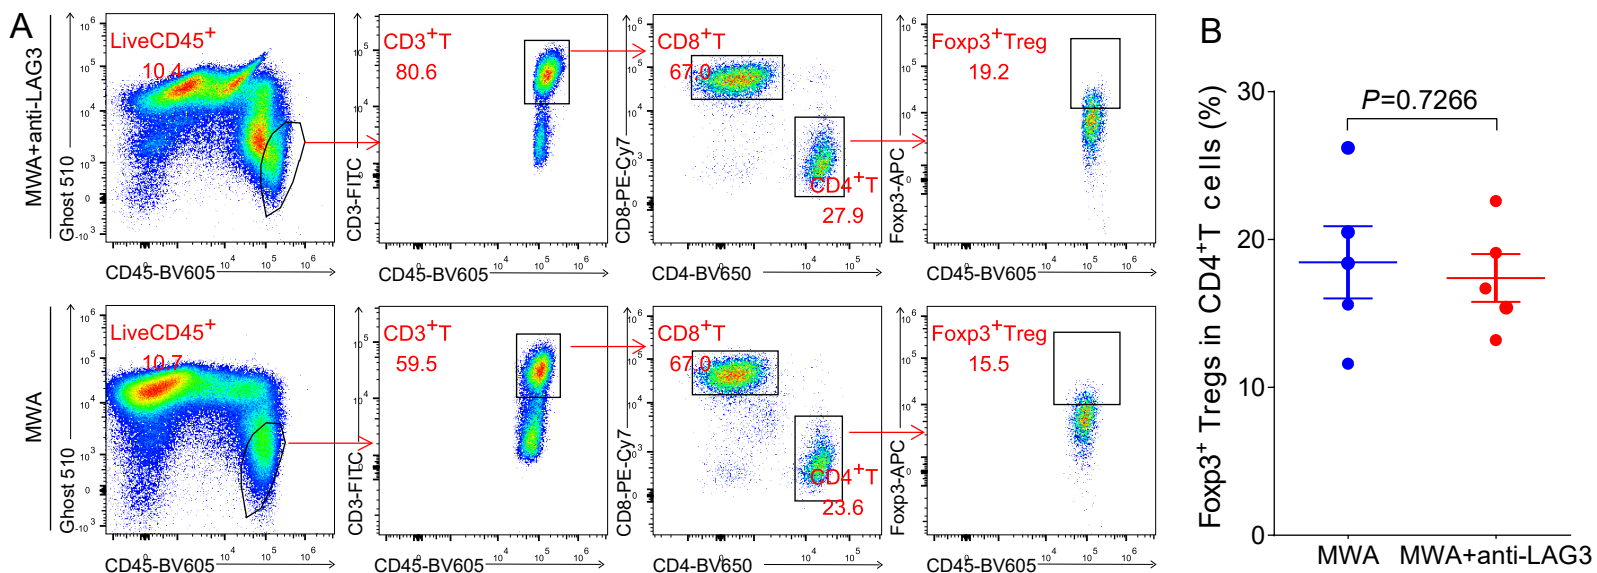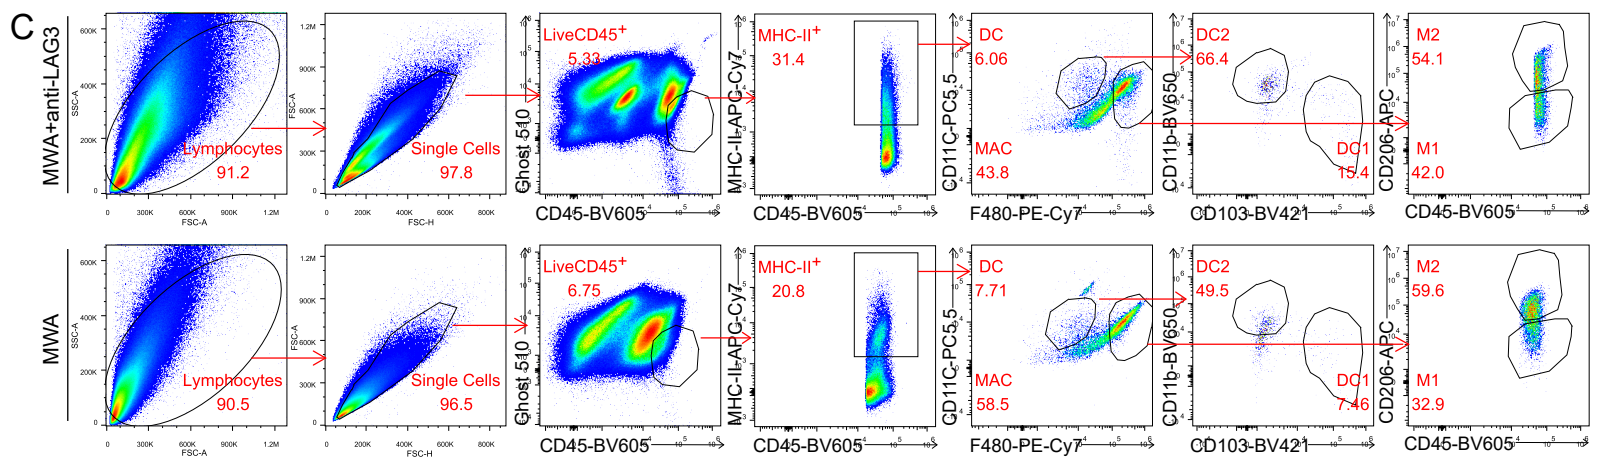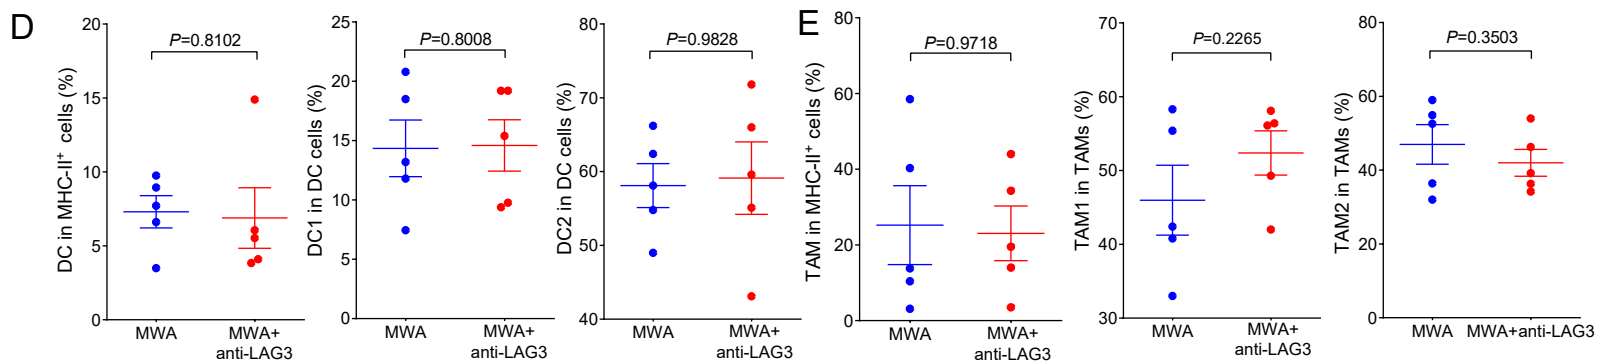

Supplement: MOESM1 [file 23558694]
